# Supplementary material for: Hydrophobic polyvinylidene fluoride fibrous membranes with simultaneously water/windproof and breathable performance
Source: Royal Society of Chemistry journal article supplement (doi:10.1039/c6ra17565a), 2016-01-01
Supplement: c6ra17565a1.pdf [file c6ra17565a1.pdf]

Supporting information for

## **Hydrophobic Polyvinylidene Fluoride Fibrous Membranes with Simultaneously Water/windproof and Breathable Performance**

Fangfang Yang <sup>a,b,1</sup>, Yang Li <sup>a,b,1</sup>, Xi Yu <sup>b,c</sup>, Guangnan Wu <sup>b,d</sup>, Jianyong Yu <sup>b</sup>, Bin Ding <sup>a,c,\*</sup>

<sup>a</sup> State Key Laboratory for Modification of Chemical Fibers and Polymer Materials, College of Material Science and Engineering, Donghua University, Shanghai 201620, China

<sup>b</sup> Nanofibers Research Center, Modern Textile Institute, Donghua University, Shanghai 200051, China

<sup>c</sup> Key Laboratory of Textile Science & Technology, Ministry of Education, College of Textiles, Donghua University, Shanghai 201620, China

<sup>d</sup> College of Chemistry, Chemical Engineering and Biotechnology, Donghua University, Shanghai 200051, China

\* Corresponding author: Dr. Bin Ding (E-mail: [binding@dhu.edu.cn](mailto:binding@dhu.edu.cn))

<sup>1</sup> These authors have contributed equally to this work.

**Table 1** Detailed compositions and properties of the PVDF solutions with various DMAc/acetone ratio and NaCl concentrations.

| PVDF concentration (wt%) | DMAc/acetone Ratio (w/w) | NaCl concentration (wt%) | Surface tension (mN/m) | Viscosity (cps) | Conductivity (μs/cm) |
|--------------------------|--------------------------|--------------------------|------------------------|-----------------|----------------------|
| 20                       | 1/9                      | 0                        | 16.2 ± 0.2             | 442 ± 8         | 9.6 ± 0.1            |
| 20                       | 3/7                      | 0                        | 24.4 ± 0.3             | 434 ± 12        | 10.9 ± 0.1           |
| 20                       | 5/5                      | 0                        | 26.4 ± 0.1             | 424 ± 12        | 10.2 ± 0.1           |
| 20                       | 7/3                      | 0                        | 28.8 ± 0.1             | 439 ± 17        | 10.8 ± 0.1           |
| 20                       | 9/1                      | 0                        | 32.0 ± 0.3             | 436 ± 13        | 9.9 ± 0.1            |
| 20                       | 7/3                      | 0.003                    | 28.2 ± 0.3             | 426 ± 11        | 22.2 ± 0.1           |
| 20                       | 7/3                      | 0.006                    | 28.2 ± 0.2             | 437 ± 13        | 36.1 ± 0.1           |
| 20                       | 7/3                      | 0.009                    | 28.6 ± 0.1             | 448 ± 11        | 48.1 ± 0.1           |

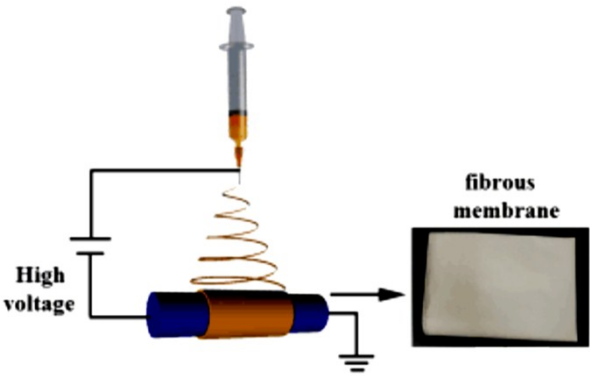

**Fig. S1** Scheme illustration of the fabrication process of PVDF fibrous membranes via electrospinning.

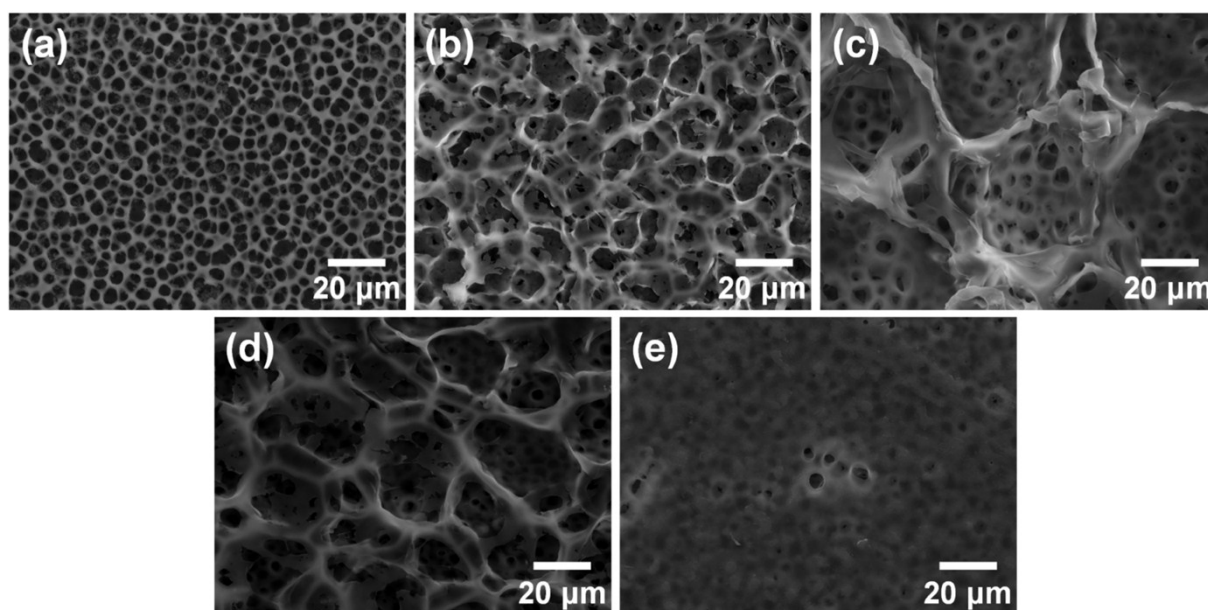

**Fig. S2** SEM images of PVDF casting films obtained from solutions with various DMAC/acetone ratio: (a) 1/9, (b) 3/7, (c) 5/5, (d), 7/3, and (e) 9/1, respectively.

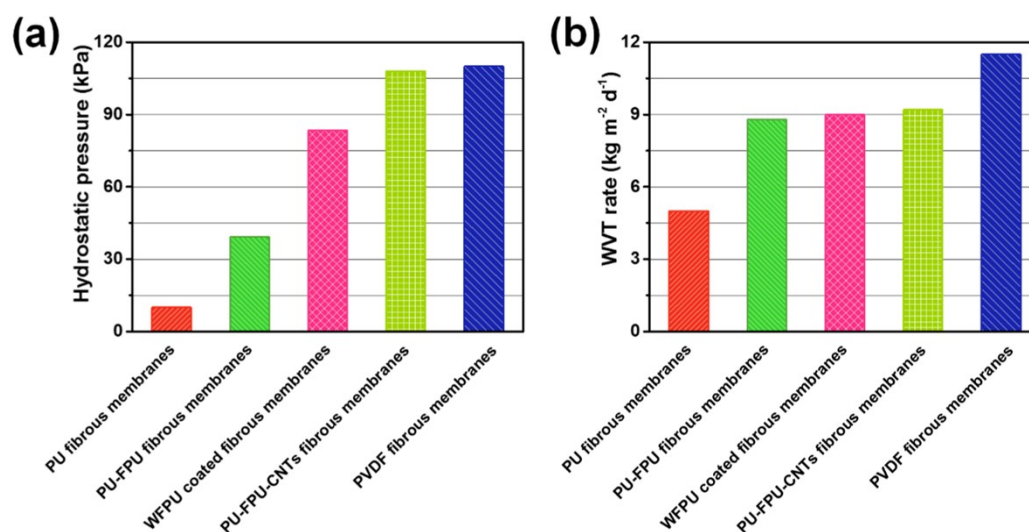

**Fig. S3** Comparison of waterproof and breathable properties between the membranes in previous literature and the as-prepared PVDF fibrous membranes in this manuscript.
